# Supplementary material for: Size and shape evolution of upconverting nanoparticles using microwave assisted synthesis
Source: Royal Society of Chemistry journal article supplement (doi:10.1039/b927225a), 2010-01-01
Supplement: b927225a.pdf [file b927225a.pdf]

## Supporting Information

# Size and shape control of up-converting nanoparticles using microwave assisted synthesis

*Hai-Qiao Wang<sup>a</sup>, Richard D. Tilley<sup>b</sup> and Thomas Nann<sup>a\*</sup>*

<sup>a</sup> School of Chemistry, University of East Anglia (UEA), Norwich NR4 7TJ, UK

<sup>b</sup> School of Chemical and Physical Sciences and the MacDiarmid Institute of Advanced Materials and Nanotechnology, Victoria University of Wellington, P.O. Box 600, Wellington, New Zealand

\*Address correspondence to [t.nann@uea.ac.uk](mailto:t.nann@uea.ac.uk).

### **General synthesis procedure for AYF<sub>4</sub>:Yb, Er (with A = Na, Li)**

Upconverting nanoparticles AYF<sub>4</sub>:Yb, Er (with A = Na, Li) were synthesized with the procedure described in the experimental section in the manuscript. In a typical process, 78.47 mg of Na-TFA, 177.76 mg of Y-TFA, 42.54 mg of Yb-TFA and 4.22 mg of Er-TFA were dissolved in 6 ml mixture of OA and ODE (v:v=1:1). First, the solution was stirred and heated to 100 °C, repeatedly degassed and purged with nitrogen. Then, the degassed solution was transferred into the reacting vessel of the Discover LabMate microwave reactor (CEM, USA) and heated to 290 °C for 20 minutes by microwave irradiation. The upconverting nanocrystals were collected by centrifugation when the reaction mixture

Supplementary Material (ESI) for CrystEngComm  
This journal is © The Royal Society of Chemistry 2010

was cooled down to room temperature, and washed with ethanol. The obtained upconverting nanocrystals were finally dissolved in chloroform or toluene for further experiments.

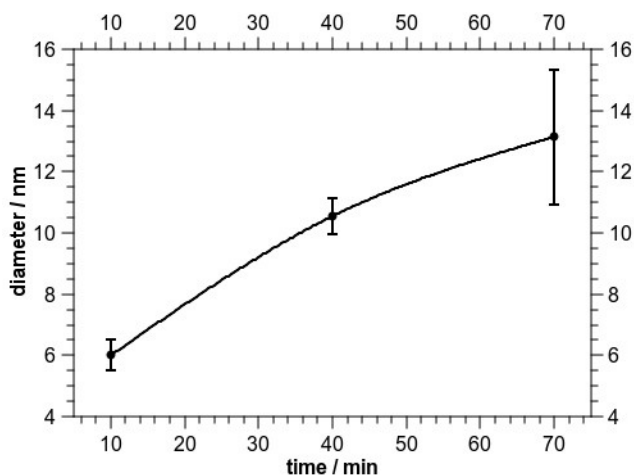

**Figure S1.** Different NaYF<sub>4</sub>:Yb<sup>3+</sup>, Er<sup>3+</sup> nanocrystal sizes obtained by different reaction times.

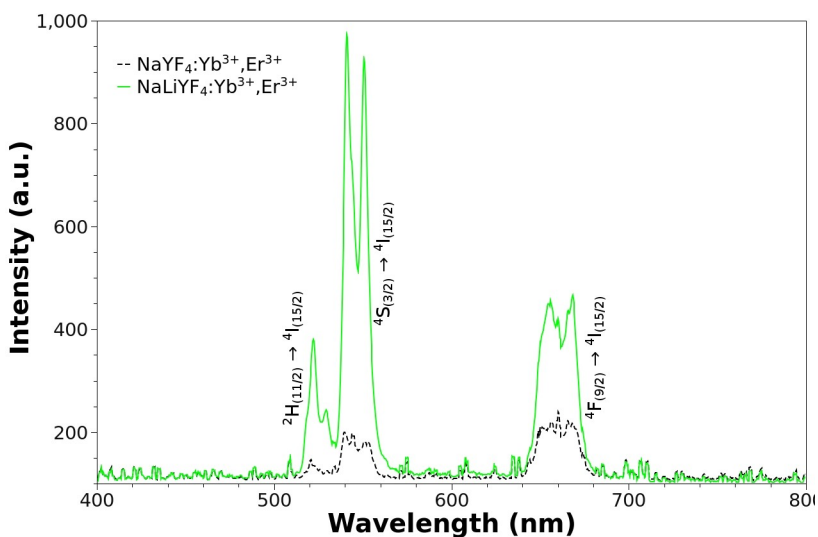

**Figure S2.** Upconversion photoluminescence spectra of NaYF<sub>4</sub>:Yb<sup>3+</sup>, Er<sup>3+</sup> (dashed, black) and Na<sub>1-x</sub>Li<sub>x</sub>YF<sub>4</sub>:Yb<sup>3+</sup>, Er<sup>3+</sup> (solid, green) nanoparticles, recorded by adapting a 980 nm laser diode (70 mW, Roither Lasertechnik, Vienna, Austria) and a home-built curvette holder to a fibre spectrometer (USB2000, OceanOptics, USA). The detector was protected from scattered excitation light by means of a 950 nm low-pass filter (Edmund Optics, Karlsruhe, Germany).

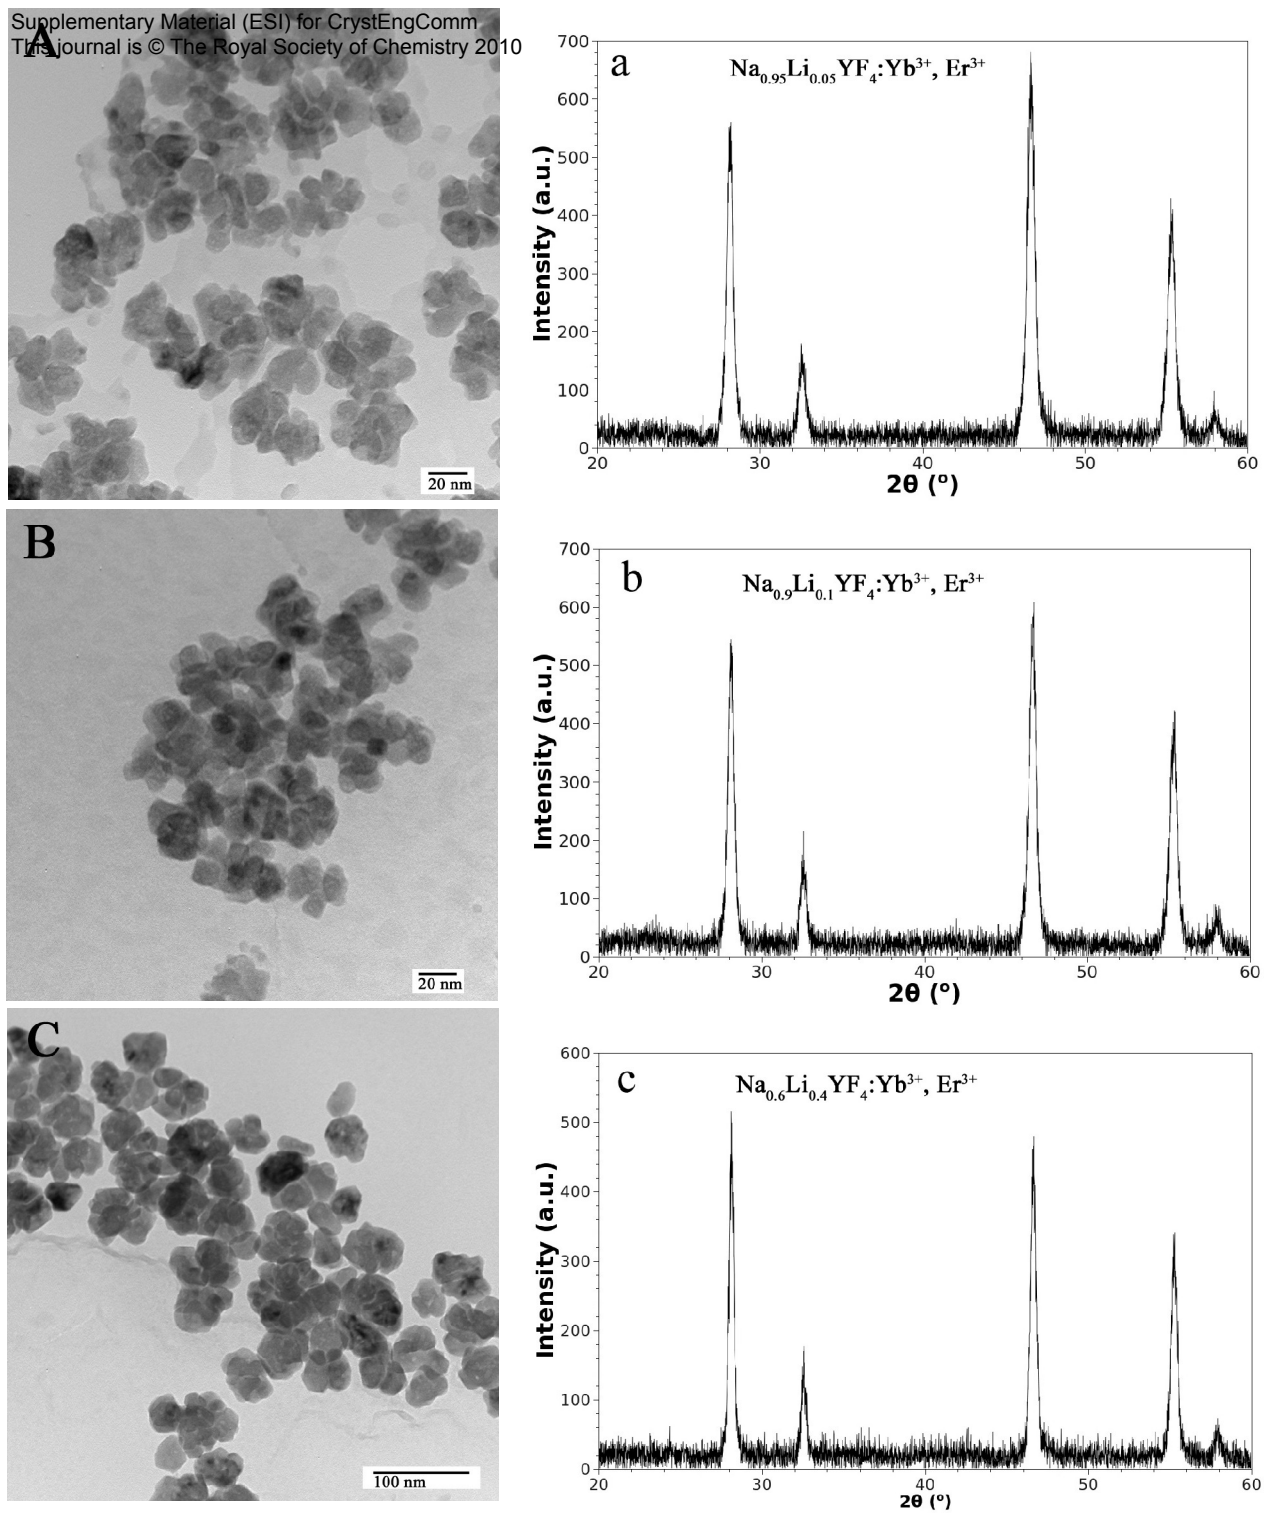

**Figure S3.** TEM micrographs and their corresponding XRD patterns of nanocrystals with lithium ratios below 50%. A) 5% lithium, B) 10% lithium, C) 40% lithium.

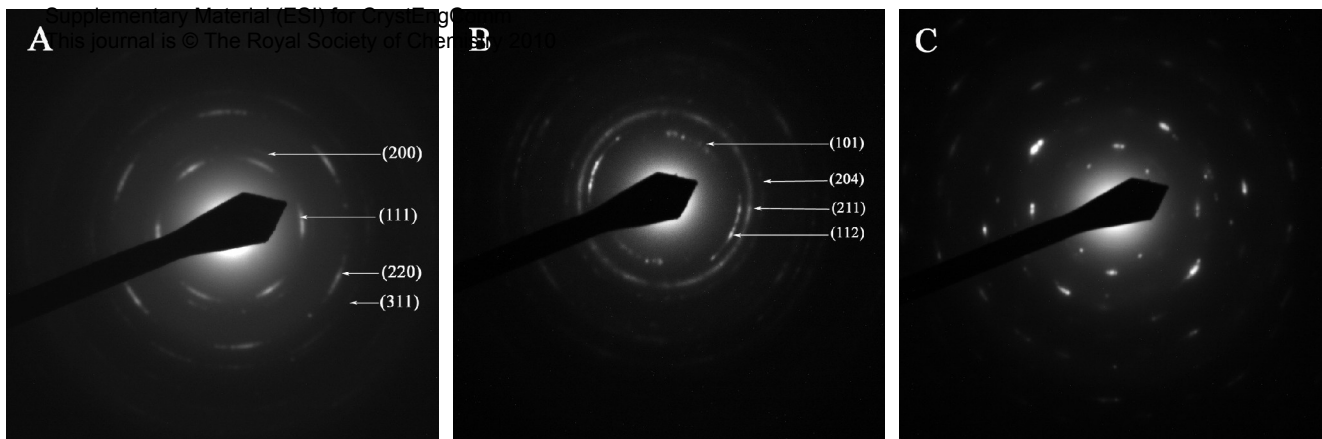

**Figure S4.** SAED pattern of A) flower-like nanocrystal, B) nanowire bundle, and C) rhombic nanocrystal.
